# Supplementary material for: Erubescensoic Acid, a New Polyketide and a Xanthonopyrone SPF-3059-26 from the Culture of the Marine Sponge-Associated Fungus Penicillium erubescens KUFA 0220 and Antibacterial Activity Evaluation of Some of Its Constituents
Source: PubMed Central journal article supplement (PMC6337093; doi:10.3390/molecules24010208), 2019-01-08
Supplement: molecules-24-00208-s001.pdf [file molecules-24-00208-s001.pdf]

## Supplementary Materials

### **Erubescensoic Acid, a New Polyketide and a Xanthonopyrone from the Culture of the Marine Sponge-Associated Fungus *Penicillium erubescens* KUFA 0220 and Antibacterial Activity Evaluation of some of its Constituents**

Decha Kumla<sup>1,2</sup>, Tida Dethoup<sup>3</sup>, Luís Gales<sup>1,4</sup>, José A. Pereira<sup>1,2</sup>, Joana Freitas -Silva<sup>1,2</sup>, Paulo M. Costa<sup>1,2</sup>, Artur M. S. Silva<sup>5</sup>, Madalena M. M. Pinto<sup>2,6\*</sup>, and Anake Kijjoa<sup>1,2\*</sup>

<sup>1</sup> ICBAS-Instituto de Ciências Biomédicas Abel Salazar, Universidade do Porto, Rua de Jorge Viterbo Ferreira, 228, 4050-313 Porto, Portugal. E-mail: [Decha1987@hotmail.com](mailto:Decha1987@hotmail.com) (D.C.), [jpereira@icbas.up.pt](mailto:jpereira@icbas.up.pt) (J. A. P.); [lgales@ibmc.up.pt](mailto:lgales@ibmc.up.pt) (L.G.); [pmcosta@icbas.up.pt](mailto:pmcosta@icbas.up.pt) (P.M.C.).

<sup>2</sup> Interdisciplinary Centre of Marine and Environmental Research (CIIMAR), Terminal de Cruzeiros do Porto de Leixões, Av. General Norton de Matos s/n, 4450-208 Matosinhos, Portugal. E-mail: [joanafreitasdasilva@gmail.com](mailto:joanafreitasdasilva@gmail.com).

<sup>3</sup> Department of Plant Pathology, Faculty of Agriculture, Kasetsart University, Bangkok, 10240, Thailand. E-mail: [tdethoup@yahoo.com](mailto:tdethoup@yahoo.com).

<sup>4</sup> Instituto de Biologia Molecular e Celular (i3S-IBMC), Universidade do Porto, Rua de Jorge Viterbo Ferreira, 228, 4050-313 Porto, Portugal.

<sup>5</sup> Departamento de Química & QOPNA, Universidade de Aveiro, 3810-193 Aveiro, Portugal. E-mail: [artur.silva@ua.pt](mailto:artur.silva@ua.pt).

<sup>6</sup> Laboratório de Química Orgânica, Departamento de Ciências Químicas, Faculdade de Farmácia, Universidade do Porto, Rua de Jorge Viterbo Ferreira, 228, 4050-313 Porto, Portugal. E-mail: [madalena@ff.up.pt](mailto:madalena@ff.up.pt).

\*To whom correspondence should be addressed, E-mail: [ankijjoa@icbas.up.pt](mailto:ankijjoa@icbas.up.pt) (A.K.), Tel.: +351-220428331; [madalena@ff.up.pt](mailto:madalena@ff.up.pt).

**Figure S1.**  $^1\text{H}$ NMR spectrum of erubescenzoic acid (**1**) (DMSO- $d_6$ , 500 MHz).

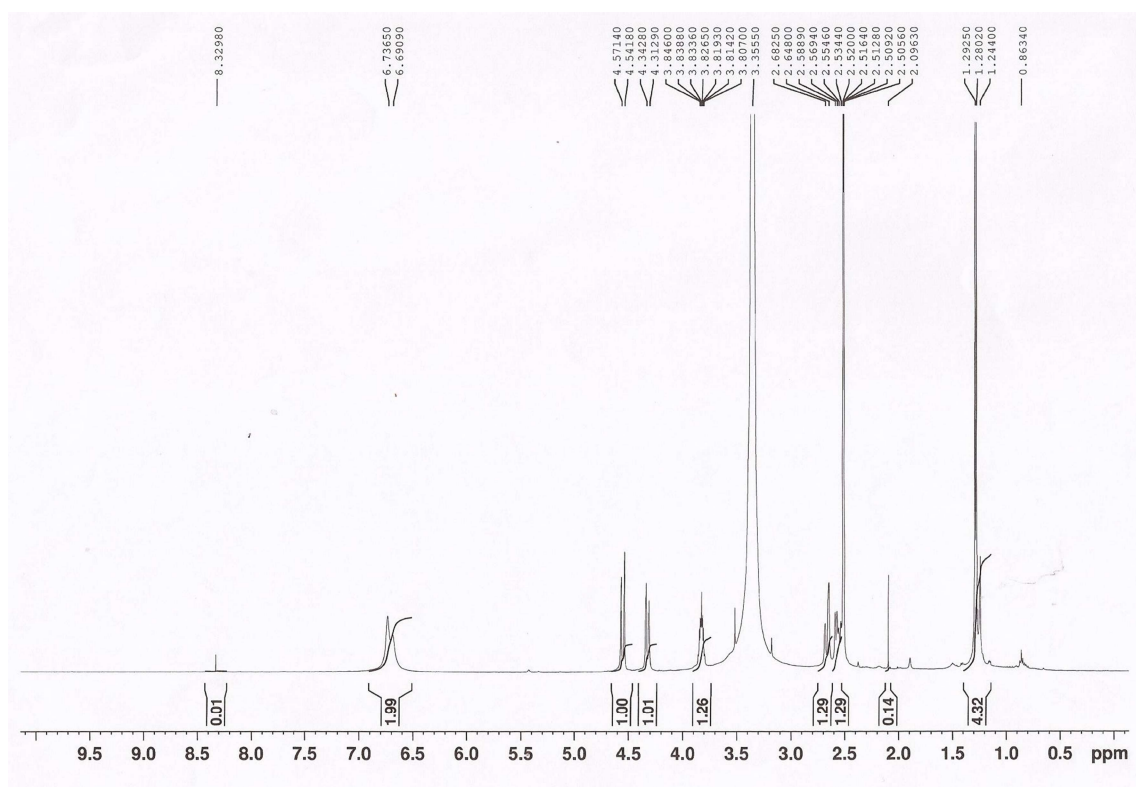

**Figure S2.**  $^{13}\text{C}$ NMR spectrum of erubescenzoic acid (**1**) (DMSO- $d_6$ , 125 MHz).

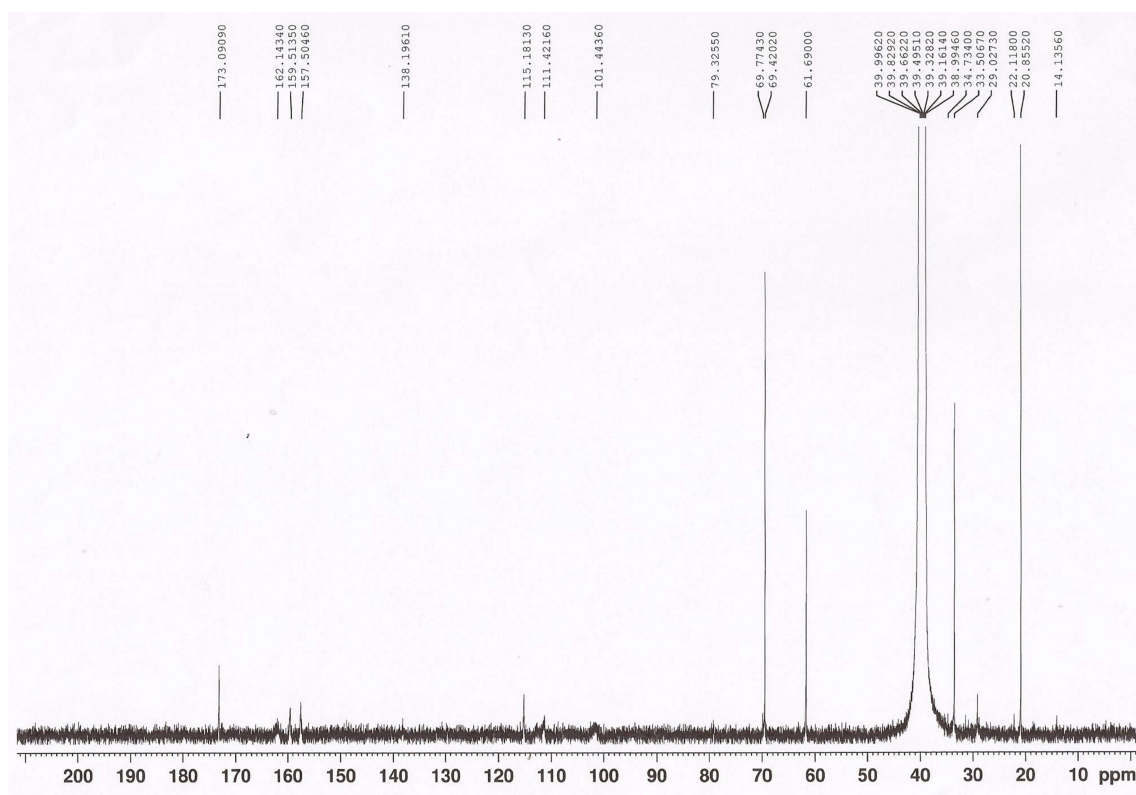

**Figure S3.** HSQC spectrum of erubescensoic acid (**1**) (DMSO-d<sub>6</sub>, 500 MHz).

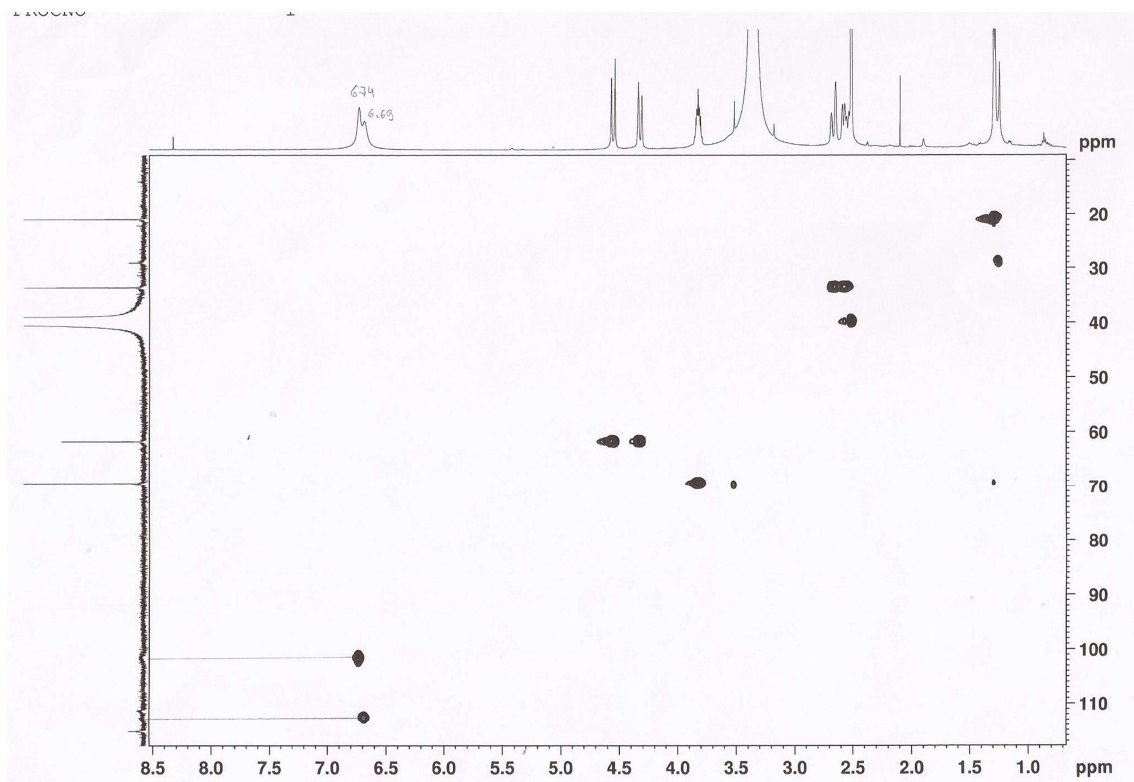

**Figure S4.** HMBC spectrum of erubescensoic acid (**1**) (DMSO-d<sub>6</sub>, 500 MHz).

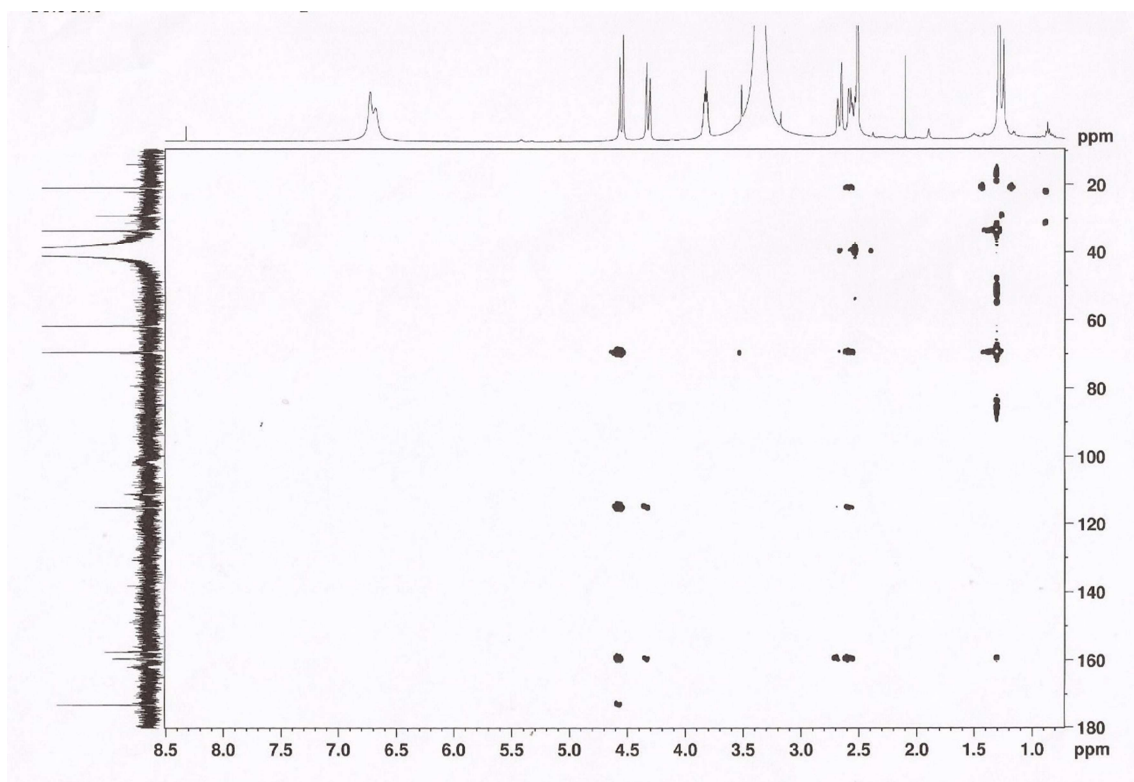

**Figure S5.**  $^1\text{H}$  NMR spectrum of SPF-3059-26 (**2**), (DMSO- $d_6$ , 500 MHz).

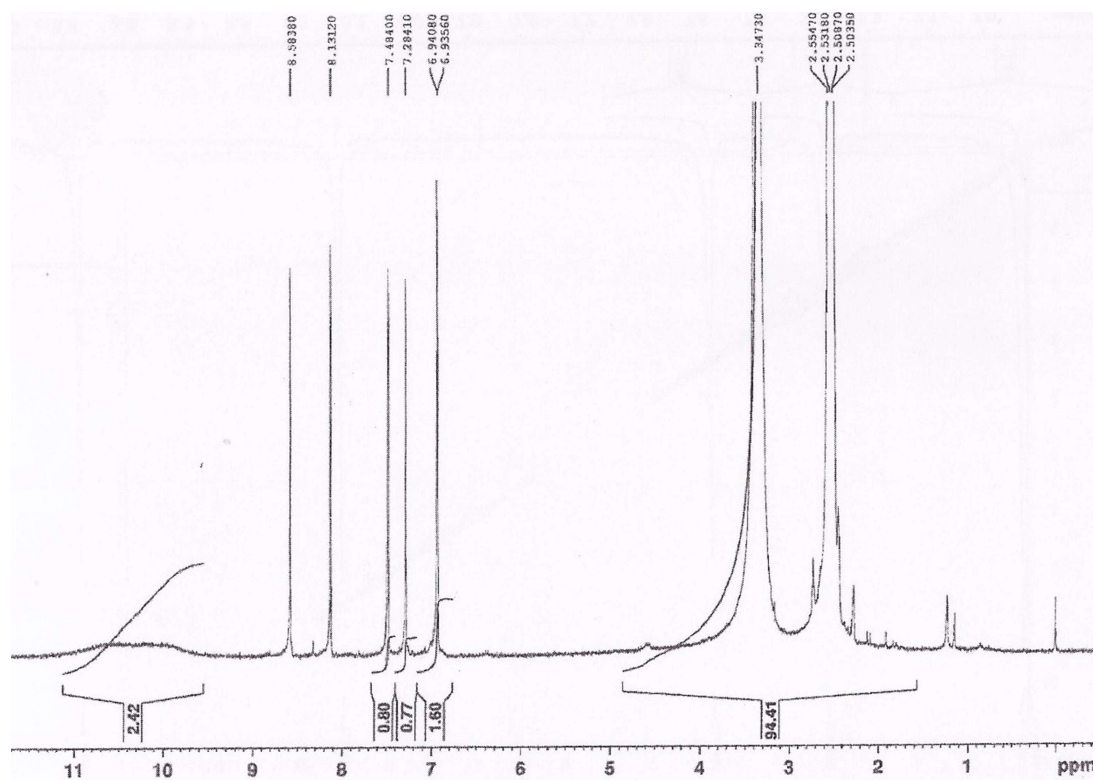

**Figure S6.** Expansion of the  $^1\text{H}$  NMR spectrum of SPF-3059-26 (**2**), (DMSO- $d_6$ , 500 MHz).

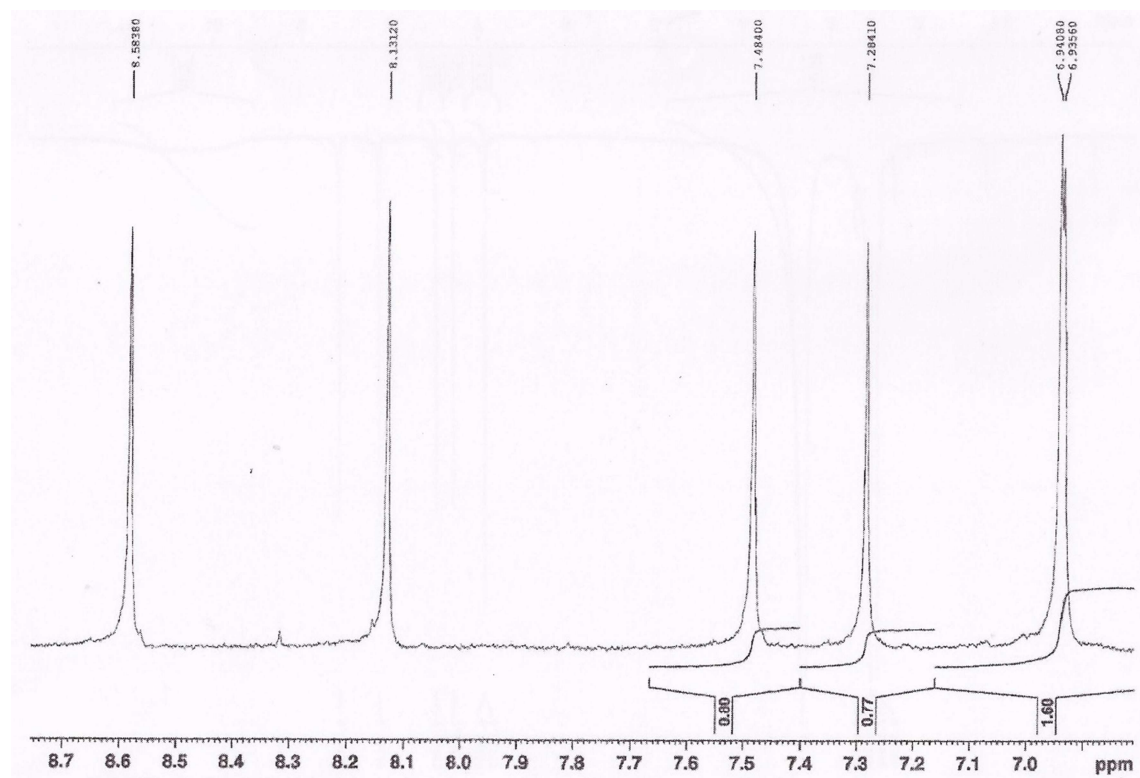

**Figure S7.**  $^{13}\text{C}$  NMR spectrum of SPF-3059-26 (**2**) (DMSO- $d_6$ , 125 MHz).

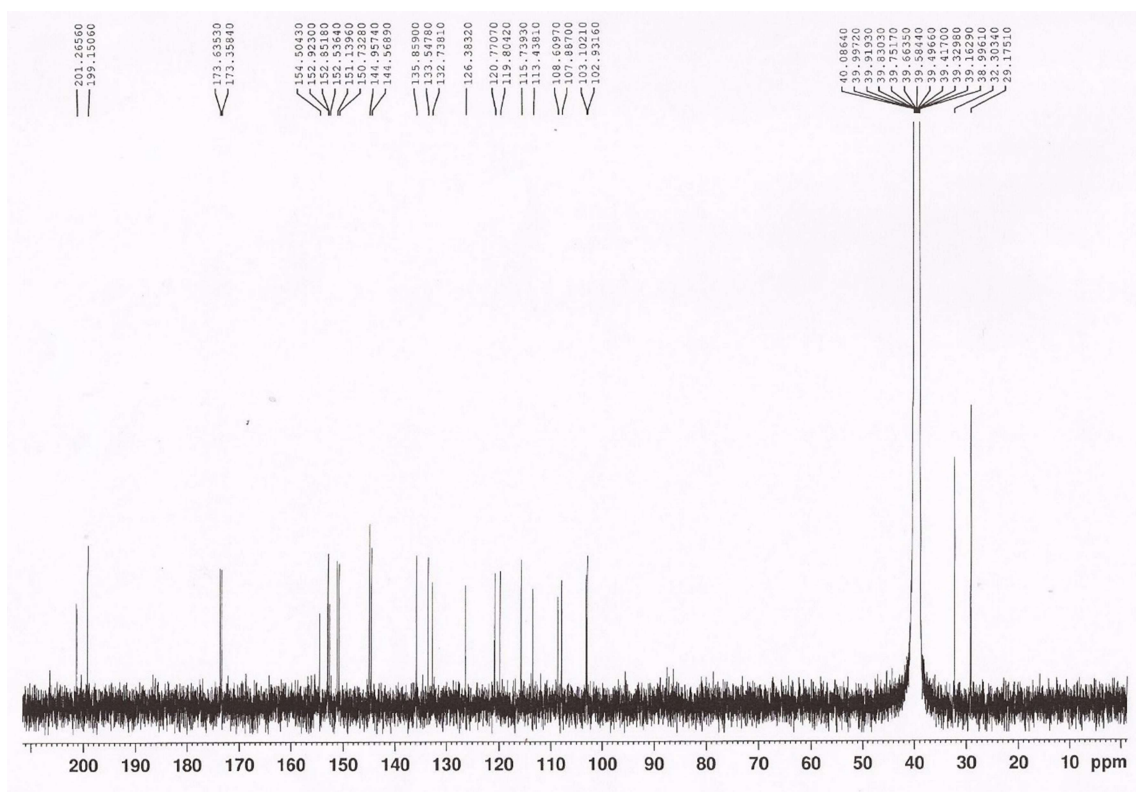

**Figure S8.**  $^{13}\text{C}$  DEPT 135 spectrum of SPF-3059-26 (**2**) (DMSO- $d_6$ , 125 MHz).

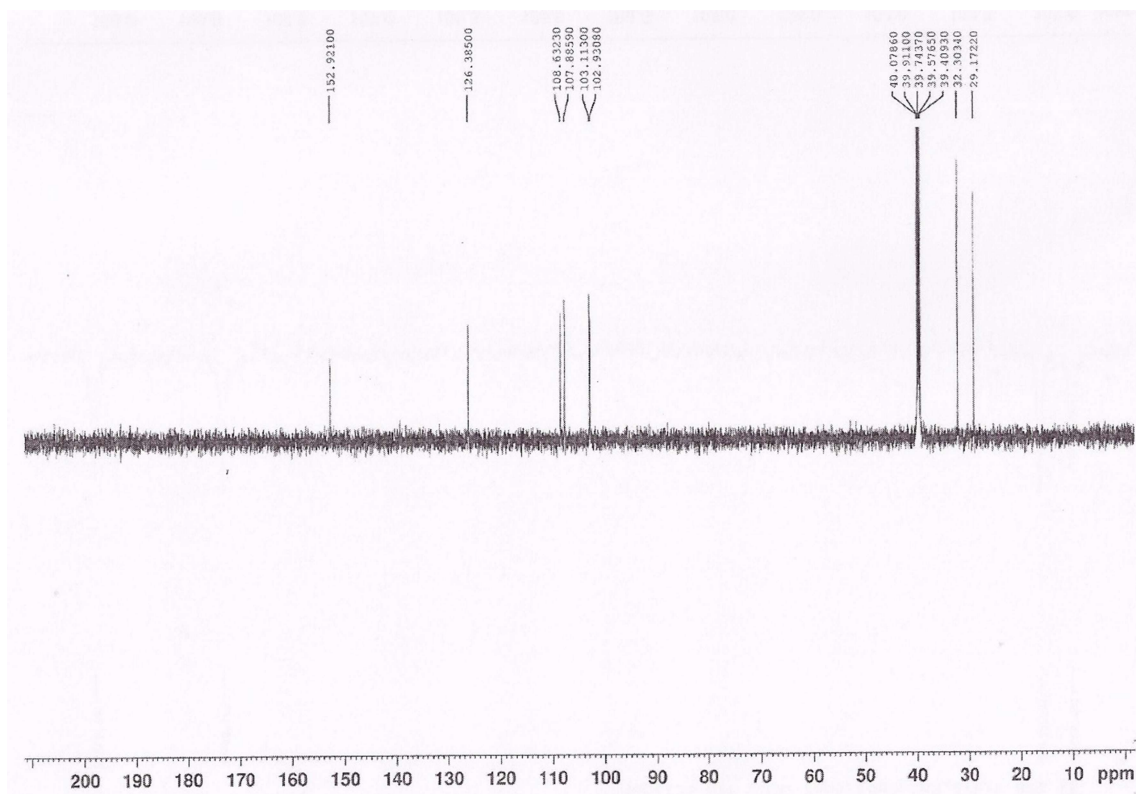

**Figure S9.** HSQC spectrum of SPF-3059-26 (**2**) (DMSO-d<sub>6</sub>, 500 MHz).

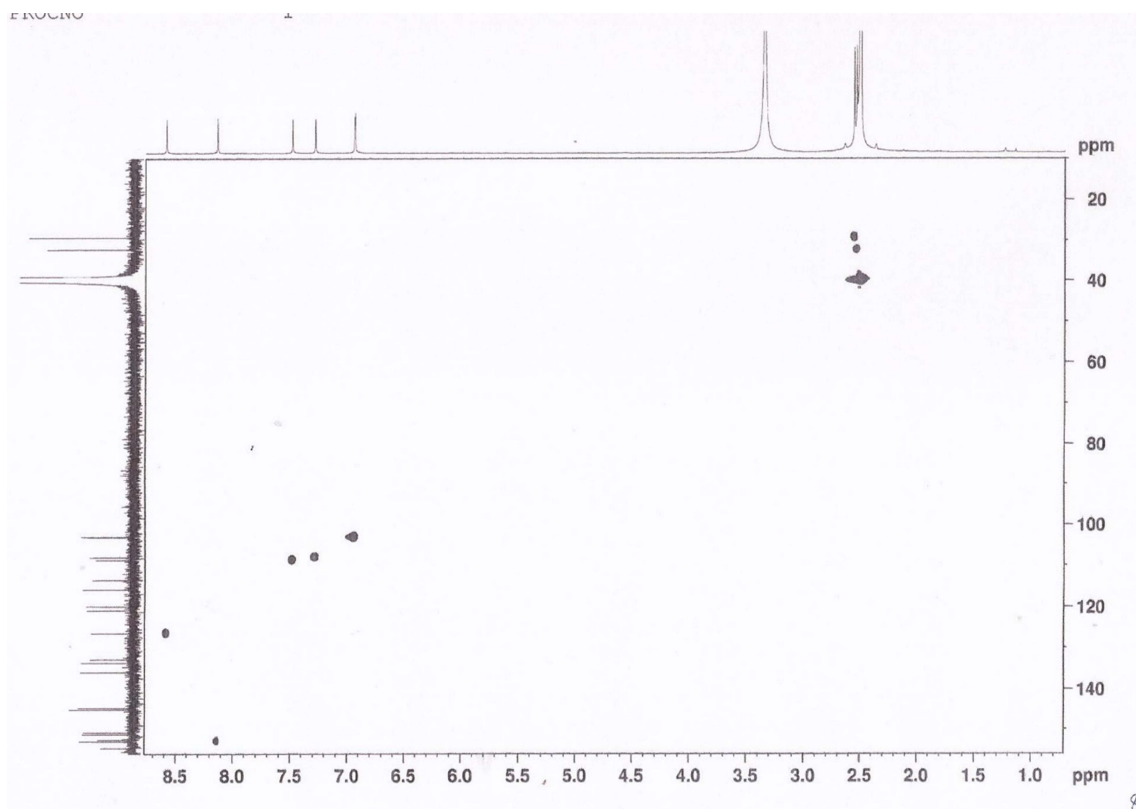

**Figure S10.** Expansion of the HSQC spectrum of SPF-3059-26 (**2**) (DMSO-d<sub>6</sub>, 500 MHz).

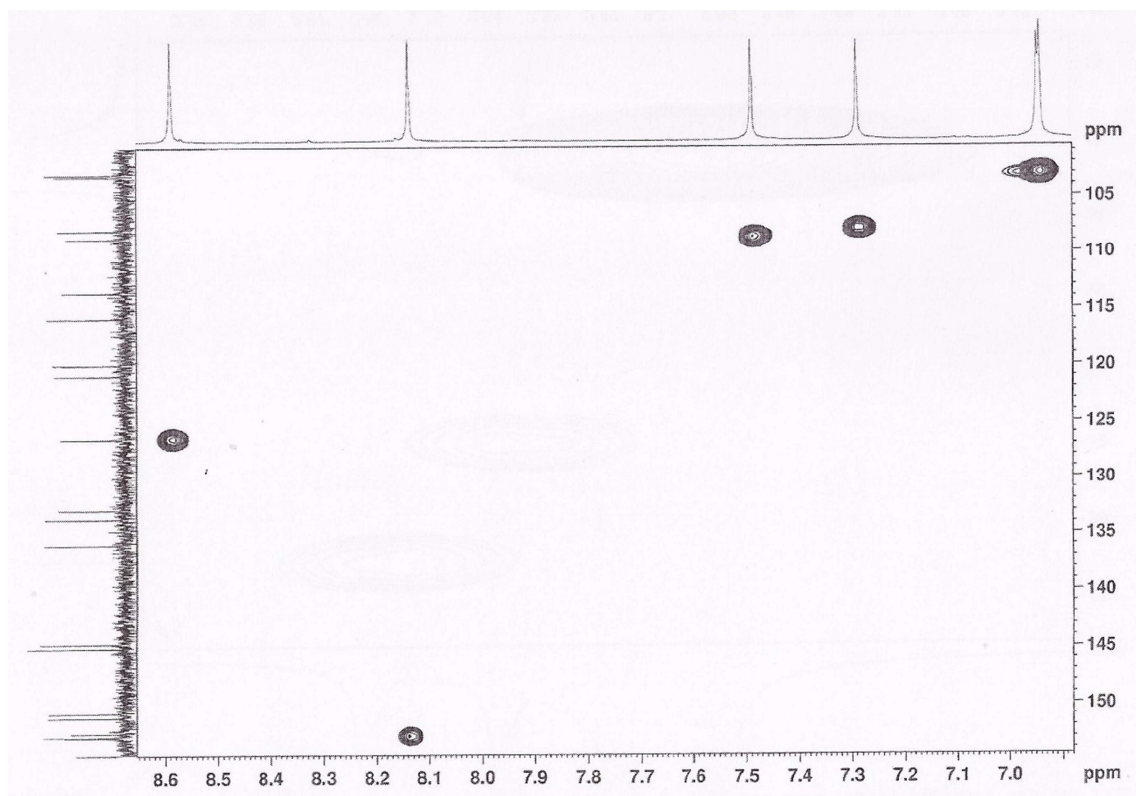

**Figure S11.** HMBC spectrum of SPF-3059-26 (**2**) (DMSO-d<sub>6</sub>, 500 MHz).

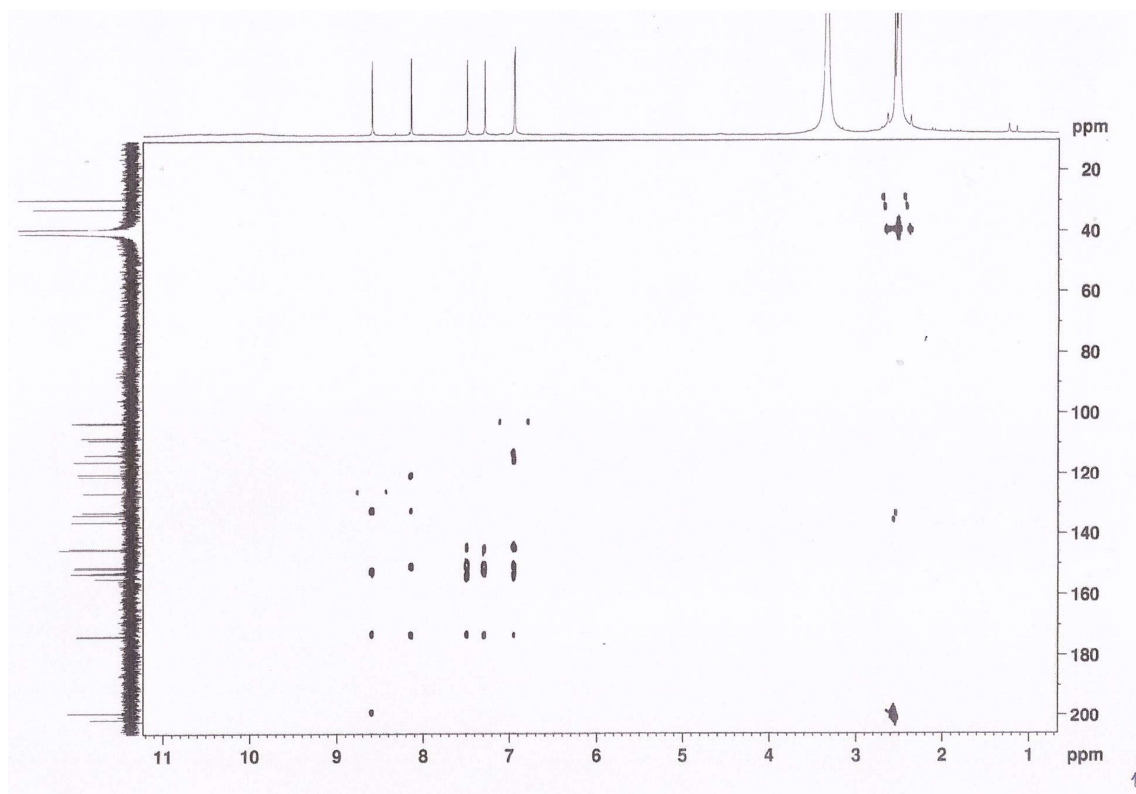

**Figure S12.** Expansion of the HMBC spectrum of SPF-3059-26 (**2**) (DMSO-d<sub>6</sub>, 500 MHz).

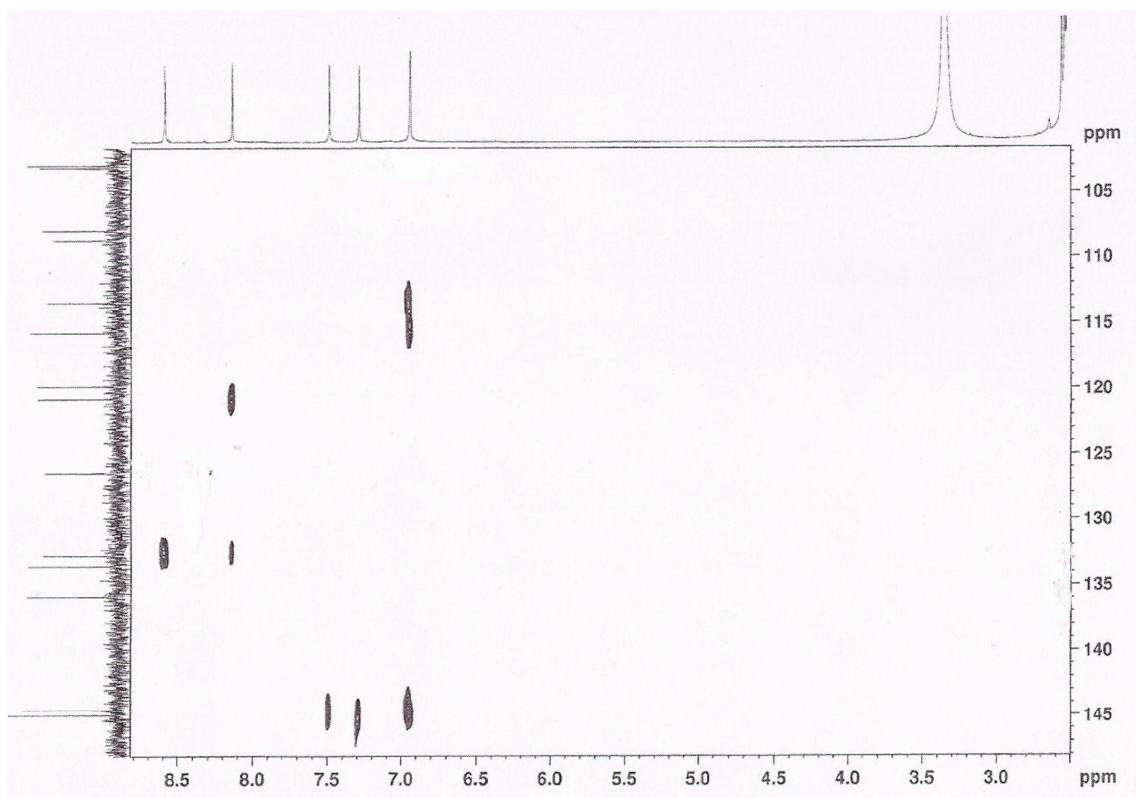

**Figure S13.** HRMS spectrum of erubescenzoic acid (1)

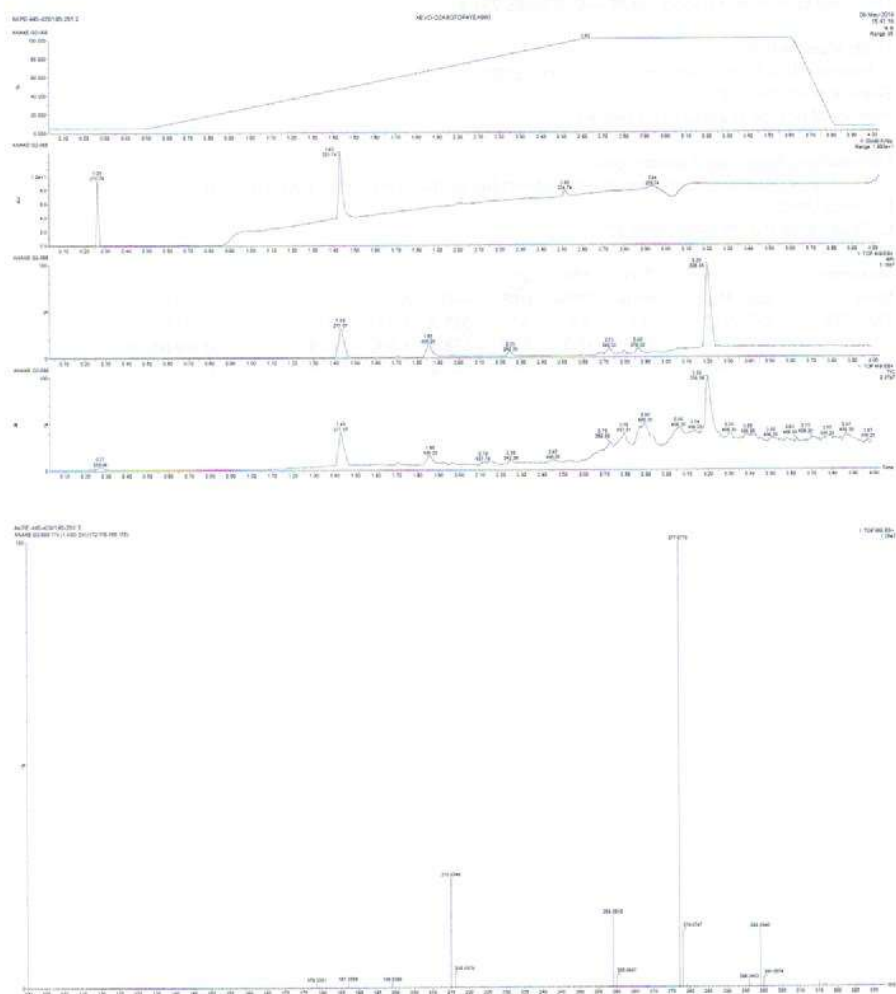

**Elemental Composition Report: AKPE 445-429/185-251.2**

**Single Mass Analysis**

Tolerance = 10.0 PPM / DBE: min = -1.5, max = 100.0

Element prediction: Off

Number of isotope peaks used for I-FIT = 3

**Monoisotopic Mass, Even Electron Ions**

299 formula(e) evaluated with 3 results within limits (up to 20 closest results for each mass)

Elements Used:

C: 10-18 H: 0-150 N: 0-30 O: 0-30

Minimum:

-1.5

Maximum:

10.0 10.0 100.0

| Mass     | Calc. Mass | mDa  | PPM  | DBE  | i-FIT | Norm  | Conf(%) | Formula      |
|----------|------------|------|------|------|-------|-------|---------|--------------|
| 277.0719 | 277.0712   | 0.7  | 2.5  | 8.5  | 519.3 | 2.373 | 9.32    | C14 H13 O6   |
|          | 277.0726   | -0.7 | -2.5 | 13.5 | 518.6 | 1.680 | 18.64   | C15 H9 N4 O2 |
|          | 277.0699   | 2.0  | 7.2  | 14.5 | 517.2 | 0.328 | 72.04   | C11 H5 N10   |



**Figure S14.** HRMS spectrum of SPF-3059-26 (2)

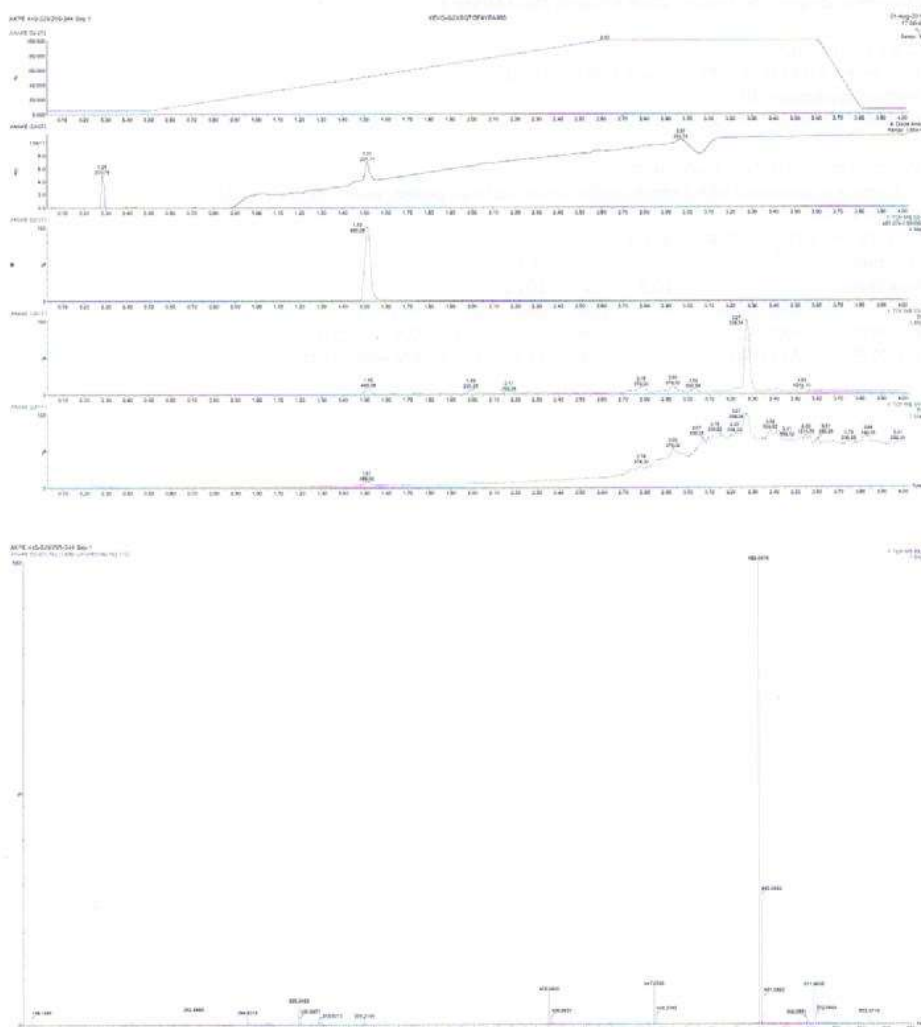

**Elemental Composition Report: AKPE 445-529/295-344 Sep 1**

**Single Mass Analysis**

Tolerance = 5.0 PPM / DBE: min = -1.5, max = 100.0

Element prediction: Off

Number of isotope peaks used for i-FIT = 3

**Monoisotopic Mass, Even Electron Ions**

31 formula(e) evaluated with 1 results within limits (up to 20 closest results for each mass)

Elements Used:

C: 26-26 H: 0-150 O: 0-30 Na: 1-1

Minimum:

-1.5

Maximum:

10.0 5.0 100.0

| Mass     | Calc. Mass | mDa  | PPM  | DBE  | i-FIT | Formula                                            |
|----------|------------|------|------|------|-------|----------------------------------------------------|
| 489.0818 | 489.0822   | -0.4 | -0.8 | 18.5 | 560.2 | C <sub>26</sub> H <sub>17</sub> O <sub>10</sub>    |
| 511.0635 | 511.0641   | -0.6 | -1.2 | 18.5 | 199.3 | C <sub>26</sub> H <sub>16</sub> O <sub>10</sub> Na |
